# Supplementary material
Source: PubMed Central journal article supplement (PMC2892598)
Supplement: emm-42-446-s001.pdf [file emm-42-446-s001.pdf]

## Supplemental Data

**Table S1.** MtDNA variations in 49 patients with MELAS or MERRF.

| Patient No<br>(Phenotype) | Control region<br>(1-576, 16024-16569)                                                                 | Other region<br>(577-16023)                                                                                                                                                                                                             | Haplogroup |
|---------------------------|--------------------------------------------------------------------------------------------------------|-----------------------------------------------------------------------------------------------------------------------------------------------------------------------------------------------------------------------------------------|------------|
| MT2-1<br>(MERRF)          | 73, 152, 235, 263, 309+C,<br>315+C, 522-523d, 16173,<br>16184, 16223, 16290,<br>16293, 16319, 16519    | 663, 750, 1438, 1736, 2706, 4248, 4769, 4824,<br>7028, 8344(H), 8794, 8860, 9650, 11719, 12705,<br>14766, 15326                                                                                                                         | A          |
| MT7-1<br>(MELAS)          | 73, 150, 199, 263, 309+C,<br>315+C, 489, 16093, 16129,<br>16183C, 16189, 16223,<br>16239, 16297, 16298 | 750, 1438, 2706, 3243(H), 4048, 4071, 4164,<br>4769, 5351, 5460, 6455, 6680, 7028, 7684, 7853,<br>8701, 8860, 9540, 9824, 10345, 10398, 10400,<br>10873, 11365, 11719, 12405, 12705, 12811,<br>14766, 14783, 15043, 15301, 15326, 16093 | M7b2       |
| MT8-1<br>(MELAS)          | 73, 143, 152, 204, 263,<br>309+C, 315+C, 489, 16223,<br>16274, 16362, 16526                            | 709, 750, 1438, 2706, 3426, 4769, 4833, 5108,<br>7028, 7621, 8701, 8854, 8860, 9540, 10398,<br>10873, 11719, 12705. 14569, 14766, 14783,<br>15043, 15301, 15326, 15746                                                                  | G3a        |
| MT11-1<br>(MELAS)         | 73, 150, 263, 309+CC,<br>315+C, 16172, 16223,<br>16257A, 16261, 16497                                  | 750, 961, 965+C <sub>3-4</sub> (H), 1438, 2706, 4769, 5222,<br>5231, 5417, 7028, 8860, 11719, 12358, 12372,<br>12705, 14766, 15067, 15326                                                                                               | N9a2       |
| MT13-1<br>(MERRF)         | 73, 152, 249d, 263, 315+C,<br>489, 16185, 16223, 16260,<br>16298                                       | 750, 1438, 2706, 3145, 4715, 4769, 6752, 7028,<br>7196A, 8188, 8584, 8701, 8860, 9090, 9380,<br>9540, 10398, 10400, 10873, 11719, 12705, 14668,<br>14766, 14783, 15067, 15301, 15326, 15355,<br>15487T, 15784                           | Z          |
| MT21-1<br>(MELAS)         | 73, 146, 199, 263, 315+C,<br>489, 522-523d, 16223,<br>16294, 16295, 16519                              | 750, 1438, 2706, 3882, 4071, 4769, 4850, 5442,<br>6053, 6455, 6620, 7028, 7961, 8701, 8860, 9540,<br>9824, 10398, 10400, 10873, 11665, 11719, 12091,<br>12705, 12804, 14755T, 14766, 14783, 15043,<br>15301, 15326                      | M7b'c      |
| MT23-1<br>(MELAS)         | 73, 263, 315+C, 489, 573+C,<br>16223, 16278, 16362                                                     | 750, 1438, 2706, 3010, 4343, 4769, 4883, 5178A,<br>7028, 8414, 8860, 9540, 10398, 10400, 10873,<br>11719, 12705, 13104, 14668, 14766, 14783,<br>15043, 15301, 15326, 15518                                                              | D4g1       |
| MT25-1<br>(MERRF)         | 73, 150, 263, 309+CC,<br>315+C, 16129, 16189,                                                          | 750, 1438, 2706, 2833, 4129, 4769, 5086, 5231,<br>5417, 7028, 8029, 8379, 8860, 9362, 11719,                                                                                                                                            | N9         |

|                           |                                                                                                                  |                                                                                                                                                                                                                                     |        |
|---------------------------|------------------------------------------------------------------------------------------------------------------|-------------------------------------------------------------------------------------------------------------------------------------------------------------------------------------------------------------------------------------|--------|
|                           | 16223, 16257A, 16261,                                                                                            | 11914, 12354, 12358, 12372, 12612, 12705,<br>14766, 15326                                                                                                                                                                           |        |
| MT27-1<br>(MELAS)         | 73, 152, 235, 263, 309+C,<br>315+C, 16129, 16213,<br>16223, 16290, 16319                                         | 663, 750, 1438, 1736, 2706, 4248, 4769, 4824,<br>7028, 8563, 8794, 8860, 10691, 11536, 11719,<br>12705, 14053, 14766, 15326                                                                                                         | A5c    |
| MT29-1<br>(MELAS/<br>PEO) | 73, 194, 263, 315+C, 489,<br>522-523d, 16172, 16362,<br>16519                                                    | 750, 1382C, 1438, 2706, 3010, 4769, 4883,<br>5178A, 7028, 7630(H), 8020, 8414, 8701, 8860,<br>8964, 9296, 9540, 9824A, 10398, 10400, 10873,<br>11719, 12358, 12705, 14668, 14766, 14783,<br>15043, 15301, 15326                     | D4b2b  |
| MT30-1<br>(MELAS)         | 73, 199, 202, 207, 263,<br>309+CC, 315+C, 499,<br>16136, 16182C, 16183C,<br>16189, 16217, 16284,<br>16357, 16519 | 750, 1438, 2706, 2831, 3243(H), 4117, 4769,<br>4820, 6023, 6413, 7028, 8206, 8271-8279d, 8440,<br>8860, 11719, 13590, 14766, 15236, 15326, 15535                                                                                    | B4b1a1 |
| MT32-1<br>(MELAS)         | 73, 146, 194, 263, 309+C,<br>315+C, 489, 522-523d,<br>16223, 16362, 16519                                        | 750, 1382C, 1438, 2706, 3010, 4769, 4883,<br>5178A, 7028, 8020, 8414, 8701, 8860, 8964,<br>9296, 9540, 9824A, 10398, 10400, 10873, 11719,<br>12705, 14605, 14608, 14668, 14766, 14783,<br>15043, 15301, 15326                       | D4b2b1 |
| MT33-1<br>(MELAS)         | 73, 146, 199, 263, 309+C,<br>315+C, 373, 489, 522-523d,<br>16223, 16295, 16519                                   | 750, 1438, 2706, 3243(H), 3882, 4071, 4452,<br>4769, 4850, 5442, 6455, 7028, 7960, 8701, 8860,<br>9540, 9824A, 10398, 10400, 10873, 11389, 11665,<br>11719, 11914, 12091, 12705, 14766, 14783,<br>15043, 15301, 15326, 15787, 15924 | M7b'c  |
| MT34-1<br>(MELAS)         | 73, 150, 263, 309+C, 315+C,<br>524+AC, 16172, 16223,<br>16257A, 16261                                            | 750, 961, 965+C <sub>1-3</sub> (H), 1438, 2706, 3243(H), 3537,<br>4769, 5231, 5417, 7028, 8860, 11719, 12358,<br>12372, 12705, 14766, 15067, 15326                                                                                  | N9a2   |
| MT35-1<br>(MERRF)         | 73, 150, 263, 315+C, 489,<br>522-523d, 16092, 16164(H),<br>16172, 16182C, 16183C,<br>16189, 16223, 16266, 16362  | 750, 752, 1107, 2706, 4769, 4883, 5178A, 5301,<br>7028, 8701, 8860, 9180, 9540, 10397, 10398,<br>10400, 10873, 11719, 11944, 12026, 12705,<br>14766, 14783, 15043, 15301, 15326                                                     | D5a2   |
| MT36-1<br>(MELAS)         | 73, 195, 249d, 263, 315+C,<br>522-523d, 16092A, 16291,<br>16304                                                  | 750, 1005, 1438, 1824, 2706, 3531, 3970, 4769,<br>4811, 6392, 6962, 7028, 7828, 8860, 10310,<br>10535, 10586, 11719, 12338, 13708, 13928C,<br>14766, 15218, 15326, 15849                                                            | F      |
| MT40-1<br>(MELAS)         | 73, 199, 202, 207, 263,<br>309+CC, 315+C, 499,                                                                   | 750, 827, 1438, 2706, 2831, 4117, 4769, 4820,<br>6023, 6413, 7028, 8188, 8206, 8271-8279d, 8860,                                                                                                                                    | B4b1a1 |

|                           |                                                                                                                           |                                                                                                                                                                                                               |        |
|---------------------------|---------------------------------------------------------------------------------------------------------------------------|---------------------------------------------------------------------------------------------------------------------------------------------------------------------------------------------------------------|--------|
|                           | 16136, 16182C, 16183C,<br>16189, 16217, 16284,<br>16357, 16519                                                            | 11719, 13590, 14766, 15236, 15326, 15535                                                                                                                                                                      |        |
| MT41-1<br>(MELAS)         | 73, 146, 152, 200, 235, 263,<br>309+CC, 315+C, 522-523d,<br>16223, 16290, 16319, 16362                                    | 663, 750, 1438, 1736, 2706, 3316, 4248, 4769,<br>4824, 7028, 8794, 8860, 10410, 10882, 11719,<br>12705, 13437, 14766, 15326                                                                                   | A      |
| MT42-1<br>(MELAS)         | 73, 263, 309+C, 315+C, 489,<br>16192, 16223                                                                               | 750, 1438, 2706, 3010, 4769, 4883, 5178A, 7028,<br>8414, 8701, 8860, 9540, 10398, 10400, 10873,<br>11719, 12092A, 12705, 14668, 14766, 14783,<br>15043, 15301, 15326                                          | D4     |
| MT44-1<br>(MELAS/<br>PEO) | 73, 263, 309+C, 315+C, 522-<br>523d, 16178, 16182C,<br>16183C, 16189, 16217,<br>16240, 16261,                             | 750, 1438, 2706, 4769, 6863, 7028, 8271-8279d,<br>8860, 9717, 10398, 11719, 14410, 14766, 15326                                                                                                               | B4a    |
| MT46-1<br>(MELAS)         | 73, 151, 153, 263, 315+C,<br>522-523d, 16182C, 16183C,<br>16189, 16217, 16261,<br>16288, 16311, 16519                     | 750, 1438, 2706, 4769, 5465, 7028, 8271-8279d,<br>8860, 9123, 9932A, 9977, 10238, 10915, 11719,<br>13143, 14766, 15326                                                                                        | B4a1b  |
| MT49-1<br>(MERRF)         | 73, 150, 263, 309+C, 315+C,<br>16172, 16223, 16257A,<br>16261, 16355, 16497                                               | 750, 961, 965+C <sub>0-2</sub> (H), 1438, 2706, 4769, 5231,<br>5417, 7028, 8860, 11719, 12358, 12372, 12705,<br>13224, 14766, 15067, 15326                                                                    | N9a2ab |
| MT50-1<br>(MERRF)         | 73, 150, 263, 315+C, 489,<br>522-523d, 16092, 16164(H),<br>16172, 16182C, 16183C,<br>16189, 16223, 16266,<br>16362, 16519 | 750, 752, 1107, 2706, 3528, 4769, 4883, 5178A,<br>5301, 7028, 8701, 8802, 8860, 9180, 9540, 10397,<br>10398, 10400, 10873, 11719, 11944, 12026,<br>12705, 14766, 14783, 15043, 15301, 15326                   | D5a2   |
| MT53-1<br>(MELAS)         | 73, 152, 189, 263, 309+C,<br>315+C, 489, 16184, 16223,<br>16298, 16319                                                    | 750, 1438, 2706, 2835, 4670, 4715, 4769, 6179,<br>6671, 7028, 7196A, 8584, 8684, 8701, 8860,<br>9540, 10398, 10400, 10873, 11719, 12705, 13050,<br>13438, 14470, 14766, 14783, 15043, 15301,<br>15326, 15487T | M8a2b  |
| MT55-1<br>(MERRF)         | 53, 143, 152, 263, 315+C,<br>489, 573+C <sub>3-5</sub> (H), 16189,<br>16223, 16265C, 16274,<br>16362                      | 709, 750, 1438, 2706, 4769, 4833, 5108, 6086,<br>6221, 7028, 7621, 8701, 8860, 9540, 10398,<br>10400, 10873, 11719, 12705, 14569, 14766,<br>14783, 15043, 15301, 15326, 15746                                 | G3a    |
| MT59-1<br>(MELAS)         | 73, 152, 263, 309+C, 315+C,<br>489, 16126, 16145, 16188,<br>16189, 16223, 16381                                           | 750, 1438, 2706, 3644, 4769, 5773, 6023, 6253,<br>6620, 7028, 8701, 8860, 9540, 10256, 10398,<br>10400, 10411, 10790, 10873, 11719, 12705,                                                                    | M13a   |

|                   |                                                                          |                                                                                                                                                                                                                             |      |
|-------------------|--------------------------------------------------------------------------|-----------------------------------------------------------------------------------------------------------------------------------------------------------------------------------------------------------------------------|------|
|                   |                                                                          | 12954, 13135, 14766, 14783, 15043, 15301,<br>15326, 15924                                                                                                                                                                   |      |
| MT60-1<br>(MERRF) | 73, 263, 294, 298, 309+C,<br>315+C, 489, 16223, 16362,<br>16519          | 750, 1438, 2294, 2706, 3010, 3398, 4769, 4883,<br>5178A, 5231, 7028, 7119, 8414, 8701, 8860, 9540,<br>10398, 10400, 10873, 11719, 12705, 13104,<br>14668, 14766, 14783, 15043, 15301, 15326                                 | D4   |
| MT61-1<br>(MELAS) | 73, 150, 263, 309+C, 315+C,<br>524+AC, 16172, 16223,<br>16257A, 16261,   | 750, 961, 965+C <sub>1-3</sub> (H), 1438, 2706, 3243(H), 3537,<br>4769, 5231, 5417, 7028, 8860, 11719, 12358,<br>12372, 12705, 14766, 15067, 15326                                                                          | N9a2 |
| MT62-1<br>(MELAS) | 73, 263, 309+C, 489,<br>573+C <sub>3-5</sub> (H), 16066, 16223,<br>16311 | 709, 750, 1438, 2706, 3172+C, 4035, 4140, 4769,<br>7028, 7250, 8701, 8793, 8856, 8860, 9540, 10398,<br>10400, 10648, 10873, 11719, 12549, 12705,<br>13152, 14502, 14766, 14783, 15040, 15043,<br>15071, 15218, 15301, 15326 | M10b |
| MT63-1<br>(MERRF) | 73, 263, 309+C, 315+C, 489,<br>16223, 16356, 16362                       | 592, 709, 750, 1438, 2706, 4769, 4833, 4853,<br>5108, 5601, 7028, 8363(H), 8701, 8860, 8877,<br>9540, 10398, 10400, 10873, 11151, 11719, 12705,<br>13563, 14569, 14766, 14783, 15043, 15301,<br>15326                       | M    |
| MT67-1<br>(MELAS) | 73, 263, 315+C, 489, 16223,<br>16245, 16362                              | 750, 1438, 2706, 3010, 4769, 4833, 5178A, 7028,<br>8383, 8414, 8419, 8701, 8860, 9431, 9540, 10398,<br>10400, 10873, 11719, 12705, 14668, 14766,<br>14783, 15043, 15301, 15326                                              | D4c2 |
| MT68-1<br>(MERRF) | 73, 152, 207, 263, 309+C,<br>315+C, 489, 16129, 16223,<br>16362, 16519   | 750, 1438, 2706, 3010, 4769, 4883, 5178A, 7028,<br>7822, 8414, 8473, 8701, 8860, 9540, 10398,<br>10400, 10410, 10873, 11719, 12705, 14668,<br>14766, 14783, 14979, 15043, 15301, 15326                                      | D4a1 |
| MT69-1<br>(MERRF) | 73, 150, 263, 315+C, 489,<br>16051, 16223, 16325,<br>16362, 16519        | 709, 750, 1438, 2706, 4769, 4793, 4833, 5108,<br>7028, 7867, 8200, 8701, 8860, 9132, 9540, 10398,<br>10400, 10873, 11719, 12705, 14569, 14766,<br>14783, 15043, 15301, 15323, 15326, 15497,<br>15860                        | G1a1 |
| MT70-1<br>(MELAS) | 73, 263, 309+C, 315+C, 489,<br>16223, 16224, 16234,<br>16316, 16362      | 750, 1041, 1438, 2706, 3394, 4491, 4769, 7028,<br>8701, 8860, 9242, 9540, 10398, 10400, 10873,<br>11719, 11854, 11963, 12705, 13731, 14308,<br>14766, 14783, 15043, 15301, 15326                                            | M9a  |
| MT71-1<br>(MELAS) | 73, 195, 204, 263, 309+C,<br>315+C, 522-523d, 16140,                     | 709, 750, 960+C, 1438, 1598, 1766, 2706, 4769,<br>7028, 8271-8279d, 8584, 8784, 8829, 8860, 9950,                                                                                                                           | B5b1 |

|                   |                                                                                                              |                                                                                                                                                                                                                             |       |
|-------------------|--------------------------------------------------------------------------------------------------------------|-----------------------------------------------------------------------------------------------------------------------------------------------------------------------------------------------------------------------------|-------|
|                   | 16183C, 16189, 16243,<br>16278, 16324, 16519                                                                 | 10398, 11146, 11719, 12361, 13707, 14470,<br>14766, 15223, 15326, 15508, 15662, 15891,<br>15927                                                                                                                             |       |
| MT72-1<br>(MELAS) | 73, 194, 263, 309+C, 315+C,<br>489, 522-523d, 16111,<br>16186, 16223, 16362, 16519                           | 709, 750, 1382C, 1438, 2706, 3010, 3243(H),<br>4769, 4883, 5178A, 5320G, 7028, 8020, 8414,<br>8701, 8860, 8964, 9296, 9540, 9824A, 10398,<br>10400, 10873, 11719, 12705, 14668, 14766,<br>14783, 15043, 15301, 15326, 15397 | D4b2b |
| MT73-1<br>(MERRF) | 73, 263, 315+C, 489, 16051,<br>16150, 16223, 16278, 16362                                                    | 709, 750, 1438, 2706, 4769, 4833, 5108, 5601,<br>7028, 7600, 8701, 8860, 9377, 9540, 9575, 10398,<br>10400, 10873, 11017, 11719, 12705, 13563,<br>14200, 14569, 14766, 14783, 15043, 15301,<br>15326                        | G2a   |
| MT75-1<br>(MELAS) | 73, 263, 316+C, 489, 16129,<br>16223, 16362, 16519                                                           | 750, 1438, 3010, 4538, 4769, 4883, 5178A, 6899,<br>7028, 7270, 8414, 8701, 8764, 8860, 9540, 10295,<br>10398, 10400, 10873, 11255, 11719, 12705,<br>14668, 14766, 14783, 15043, 15301, 15326                                | D4    |
| MT77-1<br>(MELAS) | 73, 263, 309+C, 315+C, 489,<br>16184, 16223, 16298,<br>16319,                                                | 750, 1438, 2706, 2835, 3290, 3394, 4715, 4769,<br>6179, 7028, 7196A, 8584, 8684, 8701, 8860,<br>9540, 10398, 10400, 10873, 11719, 12705, 12952,<br>14470, 14766, 14783, 15043, 15244, 15257,<br>15301, 15326, 15487T, 15565 | M8a2  |
| MT78-1<br>(MELAS) | 73, 263, 309+C, 315+C, 489,<br>16223, 16293, 16362                                                           | 750, 1438, 1664, 2706, 3010, 4769, 4883, 5178A,<br>7028, 8414, 8701, 8860, 9540, 10398, 10400,<br>10873, 11696, 11719, 12705, 14668, 14766,<br>14783, 15043, 15301, 15326                                                   | D4j   |
| MT79-1<br>(MELAS) | 73, 93, 210, 263, 309+C,<br>315+C, 522-523d, 16129,<br>16140, 16187, 16189,<br>16266, 16519                  | 750, 1438, 2706, 3537, 4769, 7028, 8271-8279d,<br>8584, 8860, 9950, 9962, 10040, 10398, 11149,<br>11151, 11719, 12234, 14149, 14766, 15235,<br>15326, 15466                                                                 | B5    |
| MT80-1<br>(MERRF) | 73, 103, 131, 263, 309+CC,<br>315+C, 522-523d, 16111,<br>16140, 16183C, 16189,<br>16234, 16243, 16463, 16519 | 709, 750, 1438, 1598, 2706, 4769, 4895, 5964,<br>7028, 8271-8279d, 8473, 8584, 8829, 8860, 9950,<br>10398, 11719, 12361, 14766, 15223, 15326,<br>15508, 15662, 15850, 15851, 15927                                          | B5b2  |
| MT81-1<br>(MELAS) | 73, 146, 185, 189, 195, 196,<br>263, 309+C, 315+C, 513,<br>16172, 16182C, 16183C,<br>16189, 16217, 16223,    | 750, 827, 1438, 2706, 4769, 4926, 5277, 5460,<br>6026, 6614, 7028, 8271-8279d, 8860, 9921,<br>10750, 11719, 14133, 14766, 15326, 15535                                                                                      | B4b'd |

|                   |                                                                                                            |                                                                                                                                                                                                                     |      |
|-------------------|------------------------------------------------------------------------------------------------------------|---------------------------------------------------------------------------------------------------------------------------------------------------------------------------------------------------------------------|------|
|                   | 16295, 16519                                                                                               |                                                                                                                                                                                                                     |      |
| MT83-1<br>(MERRF) | 73, 263, 315+C, 489, 522-<br>523d, 16223, 16362                                                            | 750, 1438, 2706, 3010, 4769, 4883, 5178A, 6305,<br>6366, 7028, 8414, 8701, 8860, 9540, 10398,<br>10400, 10685, 10873, 11215, 11719, 12705,<br>14668, 14766, 14783, 15043, 15301, 15326,<br>15874                    | D4   |
| MT84-1<br>(MELAS) | 73, 152, 235, 263, 309+C,<br>315+C, 522-523d, 16093,<br>16223, 16290, 16319, 16362                         | 663, 750, 1438, 1736, 2706, 4248, 4769, 4824,<br>7028, 8860, 11719, 12705, 14766, 15258, 15326                                                                                                                      | A4   |
| MT87-1<br>(MELAS) | 73, 146, 183, 263, 315+C,<br>489, 16189, 16223, 16362                                                      | 750, 1009, 1438, 2706, 3010, 3336, 3644, 4655,<br>4769, 4883, 5048, 5178A, 7028, 8414, 8701,<br>8860, 9494, 9540, 10398, 10400, 10873, 11719,<br>12396, 12705, 13819, 14668, 14766, 14783,<br>15043, 15301, 15326   | D4   |
| MT90-1<br>(MELAS) | 73, 200, 263, 309+CC,<br>315+C, 499, 16136, 16172,<br>16183C, 16189, 16217,<br>16218, 16428, 16519         | 750, 827, 1438, 1719, 2706, 4769, 4820, 7028,<br>7521, 8065, 8271-8279d, 8860, 9101G, 10586,<br>11009, 11239, 11719, 13590, 14587, 14766,<br>15326, 15535                                                           | B4b1 |
| MT91-1<br>(MELAS) | 73, 200, 204, 207, 263,<br>309+CC, 315+C, 489, 522-<br>523d, 16182C, 16183C,<br>16189, 16223, 16360, 16362 | 750, 752, 1107, 1438, 2706, 3702, 4769, 4883,<br>5178A, 5301, 7028, 8701, 8860, 9180, 9540,<br>10397, 10398, 10400, 10873, 11719, 11944,<br>12026, 12705, 12708, 13759, 14766, 14783,<br>14798, 15043, 15301, 15725 | D    |
| MT98-1<br>(MELAS) | 73, 152, 263, 309+C, 315+C,<br>489, 16129, 16172, 16223,<br>16362, 16519                                   | 750, 1438, 2706, 3010, 3206, 4769, 4883, 5178A,<br>7028, 8414, 8473, 8701, 8860, 9540, 10398,<br>10400, 10410, 10873, 11383, 11719, 12705,<br>14668, 14766, 14783, 14979, 15043, 15301,<br>15326                    | D4a1 |

Nucleotide numbers were followed the rCRS ((NC\_012920). +: insertion, d: deletion, (H): heteroplasmic variation.
